# Supplementary material for: Calcite TLM and LSJ07 – two natural low-Sr reference materials for microbeam Sr isotope analysis
Source: Royal Society of Chemistry journal article supplement (doi:10.1039/d3ja00255a), 2023-01-01
Supplement: d3ja00255a2.xlsx [file d3ja00255a2.xlsx]

## Sheet: Sheet1
		Table S1 LA-MC-ICP-MS 87Sr/86Sr measurements of TLM and LSJ07 over two sessions.
		TLM		LSJ07
		87Sr/86Sr	2s	87Sr/86Sr	2s
Sequence 1	1	0.7097	0.00019731	0.71013	3.82651e-05
	2	0.70993	0.000196543	0.71012	5.37636e-05
	3	0.7099	0.000167927	0.71007	5.2537e-05
	4	0.7098	0.000166441	0.71001	5.7174e-05
	5	0.70957	0.000130399	0.71011	6.46777e-05
	6	0.70978	0.000138425	0.71008	5.8118e-05
	7	0.70945	0.000172896	0.71008	7.39451e-05
	8	0.70971	0.00020447	0.71004	6.68403e-05
	9	0.70947	0.000213306	0.71006	6.54539e-05
	10	0.70976	0.000173063	0.71006	6.43432e-05
	11	0.70971	0.000204492	0.70997	6.19405e-05
	12	0.70966	0.000141584	0.71009	4.66203e-05
	13	0.7096	0.000352575	0.70998	5.3876e-05
	14	0.70976	0.000197543	0.71008	6.81059e-05
	15	0.70958	0.000163314	0.71002	6.9978e-05
	16	0.70949	0.000179266	0.70997	6.25736e-05
	17	0.70967	0.00029614	0.71005	8.37427e-05
	18	0.71007	0.000356631	0.71015	7.91998e-05
	19	0.70962	0.000211184	0.71017	9.09531e-05
	20	0.7096	0.000161198	0.71004	6.0299e-05
	21	0.70962	0.000125394	0.71003	4.91467e-05
	22	0.70986	0.000109952	0.71005	5.26289e-05
	23	0.70955	0.000126173	0.71006	4.92999e-05
	24	0.70968	0.000109964	0.70997	6.73042e-05
	25	0.70973	0.000169591	0.71001	5.34441e-05
	26	0.70966	0.0001526	0.71006	7.88418e-05
	27	0.70977	0.000148154	0.7102	6.60067e-05
	28	0.70984	0.000140467	0.71023	9.23956e-05
	29	0.70975	0.000134617	0.71007	4.79593e-05
	30	0.70975	0.000154851	0.70994	5.67902e-05
	31	0.70954	0.000109813	0.70998	6.00775e-05
	32	0.70983	0.000134504	0.70993	5.57867e-05
	33	0.70973	0.000153977	0.70998	7.65412e-05
	34	0.70974	0.000103879	0.71007	4.58378e-05
	35	0.70958	0.000139819	0.71004	7.09647e-05
	36	0.70967	0.000145091	0.71011	6.75153e-05
	37	0.70956	0.000151132	0.71012	5.42492e-05
	38	0.7095	0.000143421	0.70999	6.4315e-05
	39	0.70985	0.000166476	0.71004	6.13523e-05
	40	0.7098	0.000156201	0.71012	6.04972e-05
	41	0.70972	0.000112329	0.70995	6.91149e-05
	42	0.70966	0.000123014	0.70992	7.19445e-05
	43	0.70968	0.000147249	0.71007	6.98799e-05
	44	0.70955	0.000151696	0.70993	5.69979e-05
	45	0.70966	0.000135956	0.71001	4.76943e-05
	46	0.70951	0.000126375	0.70987	6.56782e-05
	47	0.70978	0.000126649	0.71008	6.5851e-05
	48	0.7099	0.00011409	0.71006	5.54006e-05
	49	0.70969	0.000135845	0.71009	5.99712e-05
	50	0.70982	0.000145508	0.71012	6.96752e-05
	51	0.70972	0.000163597	0.71007	8.61141e-05
	52	0.70982	0.000161741	0.71006	8.02705e-05
	53	0.70975	0.000142563	0.71002	6.61599e-05
	54	0.70981	0.000143488	0.71006	6.71303e-05
	55	0.70952	0.000179499	0.71004	7.14131e-05
	56	0.70953	0.0001449	0.71005	4.90101e-05
	57	0.70935	0.000117175	0.7101	6.7629e-05
	58	0.70987	0.000120909	0.71008	7.0745e-05
	59	0.7098	0.000119228	0.71015	6.99498e-05
	60	0.7098	0.000120022	0.71008	5.54312e-05
	61	0.70985	0.000132242	0.71008	5.33683e-05
	62	0.70976	0.00011932	0.71003	5.50803e-05
	63	0.70975	0.000125973	0.71009	5.05988e-05
	64	0.70955	0.000106001	0.70998	6.23601e-05
	65	0.70977	0.000133061	0.71	4.74871e-05
	66	0.70964	0.000176276	0.71007	6.02184e-05
	67	0.7099	0.000169251	0.71006	5.34798e-05
	68	0.70958	0.000139845	0.71004	6.40136e-05
	69	0.7098	0.000159524	0.71006	6.16575e-05
	70	0.70955	0.000140989	0.71011	5.884e-05
	71	0.70971	0.0001578	0.71007	7.4367e-05
	72	0.70952	0.000114705	0.71003	6.61596e-05
	73	0.7096	0.000139791	0.71027	0.000133349
	74	0.70963	0.000114012	0.71027	8.55765e-05
	75	0.70977	0.000209399	0.70999	5.82799e-05
	76	0.70933	0.000176033	0.71028	7.42044e-05
	77	0.7095	0.000155726	0.71008	6.95238e-05
	78	0.70945	0.00013753	0.71009	5.36771e-05
	79	0.7096	0.000124419	0.71002	7.31931e-05
	80	0.70964	0.000140184	0.70995	5.84326e-05
	81	0.70959	0.000143745	0.71006	6.61333e-05
	82	0.70955	0.000143764	0.71011	5.41215e-05
	83	0.70946	0.000150822	0.70999	5.61056e-05
	84	0.70967	0.000185295	0.71009	6.37849e-05
	85	0.70965	0.000151608	0.71018	9.5451e-05
	86	0.70945	0.000194999	0.71015	0.000110811
	87	0.70966	0.000128069	0.71011	9.04205e-05
	88	0.70963	0.000138012	0.71021	8.25127e-05
	89	0.70979	0.000122328	0.71015	5.53472e-05
	90	0.70995	0.000126138	0.71005	8.7858e-05
	91	0.70969	0.000128622	0.70999	5.07904e-05
	92	0.70981	0.000136314	0.71002	6.97303e-05
	93	0.70969	0.000166291	0.71008	6.74927e-05
	94	0.70983	0.000120818	0.71014	6.81278e-05
	95	0.70968	0.000125714	0.71018	0.000105243
	96	0.7096	0.000110315	0.71013	7.36602e-05
	97	0.70978	0.000267468	0.7101	5.83069e-05
	98	0.70961	0.000174265	0.71027	0.000121784
	99	0.70984	0.000135568	0.71034	7.84176e-05
	100	0.70959	0.000112065	0.71011	7.99199e-05
	101	0.70979	0.000104305	0.71019	9.16101e-05
	102	0.70963	0.00010368	0.71009	4.98125e-05
	103	0.70979	0.000118158	0.71005	0.000263337
	104	0.70967	9.84412e-05	0.70997	9.09786e-05
	105	0.70985	0.000102067	0.71013	5.44569e-05
	106	0.70978	9.38438e-05	0.7101	0.000283925
	107	0.70976	0.000100253	0.70997	0.000260122
	108	0.70964	9.51258e-05	0.71015	5.60373e-05
	109	0.7097	0.000104302	0.70999	0.00026765
	110	0.70979	0.000102339	0.71011	7.41771e-05
	111	0.70965	9.98164e-05	0.71005	6.13784e-05
	112	0.70956	0.000111317	0.71009	6.61407e-05
	113	0.70961	7.81114e-05	0.71009	5.11738e-05
	114	0.70968	9.54158e-05	0.71004	6.10416e-05
	115	0.70969	0.000103529	0.71011	6.7011e-05
	116	0.70963	9.8135e-05	0.71005	5.29531e-05
	117	0.70984	0.000118096	0.71012	4.95185e-05
	118	0.70981	0.000116745	0.71011	4.45385e-05
	119	0.70968	9.22766e-05	0.71005	4.8543e-05
	120	0.7096	0.000116687	0.71008	4.7787e-05		0.709686	0.000258776	0.710072	0.0001568
Sequence 2	121	0.70963	0.000100619	0.71008	4.65346e-05
	122	0.70965	0.000143682	0.71009	3.94466e-05
	123	0.70961	0.000121051	0.71006	4.4224e-05
	124	0.70962	0.000103166	0.70995	5.38304e-05
	125	0.70967	0.000101014	0.71012	6.50817e-05
	126	0.7097	0.000110483	0.7101	4.89314e-05
	127	0.70971	0.000125752	0.71006	4.69694e-05
	128	0.70965	0.000132419	0.71002	6.54788e-05
	129	0.70979	0.000123824	0.71002	4.97975e-05
	130	0.7097	0.000116755	0.71008	4.50183e-05
	131	0.70975	0.000103026	0.71007	4.63984e-05
	132	0.70969	0.000111278	0.71011	5.1082e-05
	133	0.70965	0.000161178	0.71	6.76647e-05
	134	0.70977	0.000160201	0.70989	5.19017e-05
	135	0.7096	0.000140565	0.70993	5.13969e-05
	136	0.70977	0.000148124	0.71001	5.12566e-05
	137	0.70968	0.000120562	0.7099	4.48118e-05
	138	0.7096	0.000147925	0.71001	5.60296e-05
	139	0.70974	0.000163291	0.71002	4.97055e-05
	140	0.70991	0.00015418	0.71005	7.19569e-05
	141	0.70982	0.000160017	0.71013	9.74846e-05
	142	0.70966	0.000139177	0.71005	7.291e-05
	143	0.70954	0.000189818	0.71019	8.26067e-05
	144	0.70938	0.000201043	0.71016	6.46043e-05
	145	0.71006	0.000184822	0.70989	7.56473e-05
	146	0.70969	0.00012788	0.71013	4.51236e-05
	147	0.70983	9.6172e-05	0.71009	7.05314e-05
	148	0.70966	0.000123667	0.71008	5.62445e-05
	149	0.70965	0.000100437	0.71007	6.5878e-05
	150	0.70957	9.37669e-05	0.71014	6.41836e-05
	151	0.70966	9.08754e-05	0.71013	6.08524e-05
	152	0.70986	0.000101902	0.71013	6.3974e-05
	153	0.70986	9.46792e-05	0.71003	6.25486e-05
	154	0.70977	0.000127798	0.71013	6.42146e-05
	155	0.70966	0.000117538	0.71008	5.9503e-05
	156	0.7097	0.000104026	0.71006	6.64864e-05
	157	0.70972	0.00010671	0.71002	4.71943e-05
	158	0.70979	0.000105785	0.71015	5.03187e-05
	159	0.7097	0.000103608	0.7101	6.10847e-05
	160	0.70959	8.85239e-05	0.71007	5.96986e-05
	161	0.7098	9.58053e-05	0.71002	7.41733e-05
	162	0.70962	0.00011177	0.70988	6.56811e-05
	163	0.70955	0.000131697	0.71001	5.27878e-05
	164	0.70985	0.000130916	0.71001	5.9988e-05
	165	0.70963	9.92275e-05	0.71019	5.22118e-05
	166	0.70973	0.000126714	0.71018	6.38245e-05
	167	0.70978	0.000110835	0.71008	4.91037e-05
	168	0.70978	0.000112465	0.71004	6.3354e-05
	169	0.70987	0.000122258	0.71003	7.07271e-05
	170	0.70966	0.000153085	0.71008	6.15877e-05
	171	0.70975	0.000147783	0.71004	5.45135e-05
	172	0.70962	0.000167765	0.71003	4.71519e-05
	173	0.7098	0.000151092	0.70997	6.72163e-05
	174	0.7097	0.000134691	0.71014	6.22067e-05
	175	0.70967	0.00013771	0.71012	6.54657e-05
	176	0.70977	0.000102213	0.70988	7.14836e-05
	177	0.70967	0.000138218	0.71001	5.03067e-05
	178	0.7098	0.000142867	0.7099	6.11844e-05
	179	0.70958	0.000157368	0.70991	6.9422e-05
	180	0.70971	0.000160923	0.7101	7.3951e-05
	181	0.70972	0.000136485	0.7101	5.25496e-05
	182	0.70957	0.000128698	0.71011	6.34891e-05
	183	0.70961	0.000127549	0.71009	6.12665e-05
	184	0.70952	0.000128732	0.70996	5.82936e-05
	185	0.70965	0.00014003	0.71	5.76947e-05
	186	0.70986	0.000134647	0.71004	6.3354e-05
	187	0.70977	0.0001464	0.71002	7.41733e-05		0.709703	0.000214165	0.71005	0.000155212
Sequence 3	188	0.709657	0.000135884	0.710091	6.8092e-05
	189	0.709613	0.000160114	0.71023	6.80607e-05
	190	0.709769	0.000123949	0.710092	6.37257e-05
	191	0.709842	0.000115765	0.71012	8.05981e-05
	192	0.70976	0.000143577	0.710124	6.12906e-05
	193	0.709654	9.05479e-05	0.710143	9.89822e-05
	194	0.709736	9.13486e-05	0.710146	6.91158e-05
	195	0.70969	9.49657e-05	0.710071	7.50914e-05
	196	0.709752	9.82332e-05	0.710117	7.30369e-05
	197	0.709543	0.000109748	0.710072	6.72649e-05
	198	0.709875	0.000100533	0.709943	6.44943e-05
	199	0.709783	9.77131e-05	0.710098	6.2166e-05
	200	0.709696	8.69904e-05	0.710011	6.83094e-05
	201	0.709795	9.46882e-05	0.710073	6.22154e-05
	202	0.709675	0.00010052	0.709992	7.65925e-05
	203	0.709659	0.000115147	0.709969	6.95371e-05
	204	0.70966	0.000104818	0.710081	7.46238e-05
	205	0.709575	9.19179e-05	0.710194	6.86697e-05
	206	0.709723	0.000111339	0.710023	5.99395e-05
	207	0.709586	9.89957e-05	0.709992	5.82535e-05
	208	0.709654	0.00011633	0.710047	6.51548e-05
	209	0.709661	9.95052e-05	0.710105	6.28052e-05
	210	0.709802	0.000113444	0.710022	6.95061e-05
	211	0.709678	8.68084e-05	0.710047	8.32276e-05
	212	0.709644	9.93107e-05	0.710087	8.13616e-05
	213	0.709672	0.000101008	0.710031	7.70952e-05
	214	0.709607	0.000112397	0.710057	8.79142e-05
	215	0.709797	9.53664e-05	0.709956	0.000128311
	216	0.709696	0.000106417	0.710024	7.23605e-05
	217	0.70963	9.67139e-05	0.710089	7.27135e-05
	218	0.709696	0.000102237	0.710044	6.38577e-05
	219	0.709546	0.000111477	0.710046	6.54091e-05		0.709691	0.000165059	0.710067	0.000128821
		0.709692	0.00023353	0.710065	0.000153201
