# Supplementary figures and images for: Calcite TLM and LSJ07 – two natural low-Sr reference materials for microbeam Sr isotope analysis
Source: Royal Society of Chemistry journal article supplement (doi:10.1039/d3ja00255a), 2023-01-01

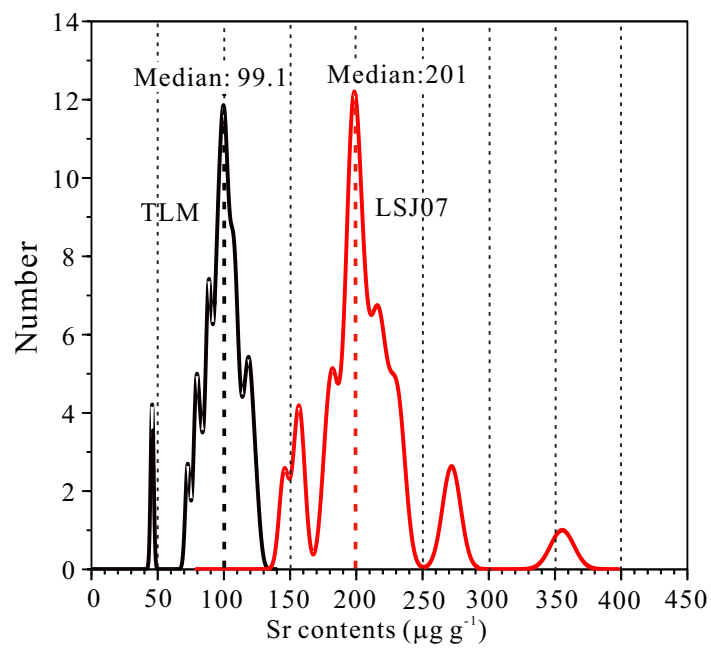

Figure S1 Sr content distributions of TLM and LSJ07

Supplement: d3ja00255a1.pdf [file d3ja00255a1.pdf]
